# Supplementary material
Source: ML conference proceedings conference paper supplement (https://openreview.net/forum?id=UgFmrYcLOt)
Supplement: supplementary_material [file poem.pdf › toucan_iclr_codebase/Qwen-Agent/examples/resource/poem.pdf]

1、忽然太行雪，昨夜飞入来。峻嶒堕庭中，严白何皑皑。——孟郊  
《雪》

2、寒色孤村幕，悲风四野闻。溪深难受雪，山冻不流云。鸥鹭飞难  
辨，沙汀望莫分。野桥梅几树，并是白纷纷。——洪升 《雪望》

3、新年都未有芳华，二月初惊见草芽。白雪却嫌春色晚，故穿庭树作  
飞花。——韩愈《春雪》

4、爆竹声中一岁除，春风送暖入屠苏。千门万户曈曈日，总把新桃换  
旧符。——王安石《元日》

5、望君烟水阔，挥手泪沾巾。飞鸟没何处，青山空向人。长江一帆  
远，落日五湖春。谁见汀洲上，相思愁白苹。——刘长卿《饯别王十  
一南游》

6、簌簌衣巾落枣花，村南村北响缱车。牛衣古柳卖黄瓜。酒困路长惟欲睡，日高人渴漫思茶。敲门试问野人家。——苏轼《浣溪沙》

7、双飞燕子几时回？夹岸桃花蘸水开。春雨断桥人不渡，小舟撑出柳阴来。——徐俯《春日游湖上》

8、梅雪争春未肯降，骚人阁笔费评章。梅须逊雪三分白，雪却输梅一段香。——卢梅坡《雪梅》

9、长安一片月，万户捣衣声。秋风吹不尽，总是玉关情。何日平胡虏，良人罢远征。——李白《子夜吴歌·秋歌》

10、独怜幽草涧边生，上有黄鹂深树鸣。春潮带雨晚来急，野渡无人舟自横。——韦应物《滁州西涧》

11、风劲角弓鸣，将军猎渭城。草枯鹰眼疾，雪尽马蹄轻。忽过新丰市，还归细柳营。回看射雕处，千里暮云平。——王维《观猎》

12、更深月色半人家，北斗阑干南斗斜。今夜偏知春气暖，虫声新透绿窗纱。——刘方平《月夜》

13、好雨知时节，当春乃发生。随风潜入夜，润物细无声。野径云俱黑，江船火独明。晓看红湿处，花重锦官城。——杜甫《春夜喜雨》

14、何处秋风至？萧萧送雁群。朝来入庭树，孤客最先闻。——刘禹锡《秋风引》

15、云想衣裳花想容，春风拂槛露华浓。若非群玉山头见，会向瑶台月下逢。——李白《清平调·其一》

16、雨前初见花间蕊，雨后全无叶底花。蜂蝶纷纷过墙去，却疑春色在邻家。——王驾《雨晴》

17、群鸡正乱叫，客至鸡斗争。驱鸡上树木，始闻叩柴荆。父老四五人，问我久远行。手中各有携，倾榼浊复清。——杜甫《村居》

18、秋风起兮白云飞，草木黄落兮雁南归。兰有秀兮菊有芳，怀佳人兮不能忘。泛楼船兮济汾河，横中流兮扬素波。箫鼓鸣兮发棹歌，欢乐极兮哀情多。少壮几时兮奈老何！——刘彻《秋风辞》

19、空山新雨后，天气晚来秋。明月松间照，清泉石上流。——王维《山居秋暝》

20、浓绿万枝红一点，动人春色不须多。——王安石《咏石榴花》

21、律回岁晚冰霜少，春到人间草木知。便觉眼前生意满，东风吹水绿参差。——张栻《立春偶成》

22、离离原上草，一岁一枯荣。野火烧不尽，春风吹又生。远芳侵古道，晴翠接荒城。又送王孙去，萋萋满别情。——白居易《赋得古原草送别》

23、京口瓜洲一水间，钟山只隔数重山。春风又绿江南岸，明月何时照我还？——王安石《泊船瓜洲》

24、蜀僧抱绿绮，西下峨眉峰。为我一挥手，如听万壑松。客心洗流水，余响入霜钟。不觉碧山暮，秋云暗几重。——李白《听蜀僧濬弹琴》

25、世味年来薄似纱，谁令骑马客京华？小楼一夜听春雨，深巷明朝卖杏花。矮纸斜行闲作草，晴窗细乳戏分茶。素衣莫起风尘叹，犹及清明可到家。——陆游《临安春雨初霁》

26、胜日寻芳泗水滨，无边光景一时新。等闲识得东风面，万紫千红总是春。——朱熹《春日》

27、明月别枝惊鹊，清风半夜鸣蝉。稻花香里说丰年，听取蛙声一片。七八个星天外，两三点雨山前。旧时茅店社林边，路转溪桥忽见。——辛弃疾《西江月·夜行黄沙道中》

28、西塞山前白鹭飞，桃花流水鳜鱼肥。青箬笠，绿蓑衣，斜风细雨不须归。——张志和《渔歌子》

29、五月天山雪，无花只有寒。笛中闻折柳，春色未曾看。——李白《塞下曲·其一》

30、北风卷地白草折，胡天八月即飞雪。忽如一夜春风来，千树万树梨花开。——作者：岑参
